# Supplementary material for: Human mid-trimester amniotic fluid (stem) cells lack expression of the pluripotency marker OCT4A
Source: PubMed Central journal article supplement (PMC6544653; doi:10.1038/s41598-019-44572-x), 2019-05-31
Supplement: 41598_2019_44572_MOESM1_ESM.pdf [file 41598_2019_44572_MOESM1_ESM.pdf]

Human mid-trimester amniotic fluid (stem) cells lack expression of the pluripotency marker OCT4A.

Filipa Vlahova, Kate E Hawkins, Anna Maria Ranzoni, Kwan-Leong Hau, Rachel Sagar, Paolo De Coppi, Anna L David, James Adjaye and Pascale V Guillot

**a**

1 agagaggggt tgagtagtcc ctcgcaagc ctcatttca ccaggcccc ggcttggggc  
61 gccttccttc cccatggcgg gacacctggc ttcggatttc gccttctcgc cccctccagg  
121 tgggtggaggt gatgggccag gggggccgga gccgggctgg gttgatcctc ggacctggct  
exon 1 181 aagcttcaa ggccctctg gaggccagg aatcgggccg ggggtgggc caggctctga  
241 ggtgtggggg attccccat gcccccgcc gtatgagttc tgtgggggga tggcgtactg  
301 tgggccccag gttggagtgg ggctagtgcc ccaaggcggc ttggagacct ctacgcctga  
361 gggcgaagca ggagtcgggg tggagagcaa ctccgatggg gcctccccg agccctgcac  
421 cgtcaccctt ggtgccgtga agctggagaa ggagaagctg gagcaaaacc cggaggagtc  
exon 2 481 ccaggacatc aaagctctgc agaaagaact cgagcaattt gccaagctcc tgaagcagaa  
541 gaggatcacc ctgggatata cacaggccga tgtggggctc accctggggg ttctatttgg  
601 gaaggtattc agccaaacga ccatctgccg ctttgaggct ctgcagctta gttcaagaa  
exon 3 661 catgtgtaag ctgcggccct tgctgcagaa gtgggtggag gaagctgaca acaatgaaaa  
721 tcttcaggag atatgcaaag cagaaaccct cgtgcaggcc cgaaagagaa agcgaaccag  
exon 4 781 tatcgagaac cgagtgagag gcaacctgga gaattgttc ctgcagtgcc cgaaaccac  
841 actgcagcag atcagccaca tcgccagca gcttgggctc gagaaggatg tggctccagt  
901 gtggttctgt aaccggcgcc agaagggcaa gcgatcaagc agcgactatg cacaacgaga  
961 ggattttgag gctgctgggt ctctttctc agggggacca gtgtccttc ctctggcccc  
exon 5 1021 agggcccat tttggtacc caggctatgg gagccctcac ttcactgcac tgtactcctc  
1081 ggtcccttc cctgaggggg aagccttcc cctgtctcc gtcaccactc tgggctctcc  
1141 catgcattca aactgaggtg cctgcccttc taggaatggg ggacaggggg aggggaggag  
1201 ctagggaaag aaaacctgga gtttgcca gggttttgg gattaagttc ttcattcact  
1261 aaggaaggaa ttgggaacac aaaggggtgg ggcaggggag ttgggggcaa ctggttggag  
1321 ggaaggtgaa gttcaatgat gctcttgatt ttaatccac atcatgtatc actttttct  
1381 taaataaaga agcctgggac acagtagata gacacactta aaaaaaaaaa

**b**

| Primer name | Primer sequence                                                                | Annealing temp | Amplicon size (bp) |
|-------------|--------------------------------------------------------------------------------|----------------|--------------------|
| OCT4A       | F: 5'- CTT CTC GCC CCC TCC AGG T-3'<br>R: 5'- AAA TAG AAC CCC CAG GGT GAG C-3' | 65             | 495                |
| OCT4-Pg1    | F: 5'-CATGCAGGCCCGAAAGAGAAAGCGAA- 3'<br>R: 5'- TGTGGCTGATCTGCAGTGTGGG- 3'      | 60             | 107                |
| OCT4-Pg3    | F: 5'- CTT CTC ACC CCC TCC AGG C- 3'<br>R: 5'- CCA CTG CTT GAT CGC TTG C- 3'   | 62             | 841                |
| OCT4-Pg4    | F: 5'-GGG ACA CCT GGC TTC GGA TG- 3'<br>R:CCC CAC ACC TCA GAG CCT GA-3'        | 56             | 172                |

**Supplementary Figure 1: (a)** Sequence of the OCT4A variant. **(b)** Sequence of primers used for qRT-PCR detection of the expression of OCT4A and pseudogenes 1 (OCT4A-Pg1), 3 (OCT4A-Pg3) and 4 (OCT4A-Pg4).

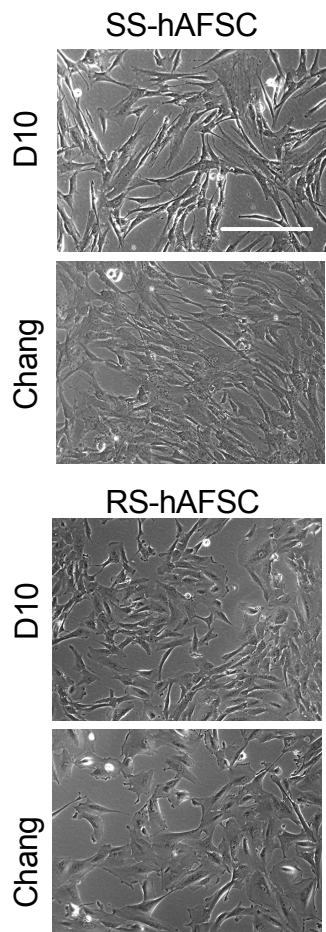

**Supplementary Figure 2:** Phase contrast images of RS-hAFSCs and SS-hAFSCs cultivated in Chang C or D10 culture medium. Scale bar = 100  $\mu\text{m}$

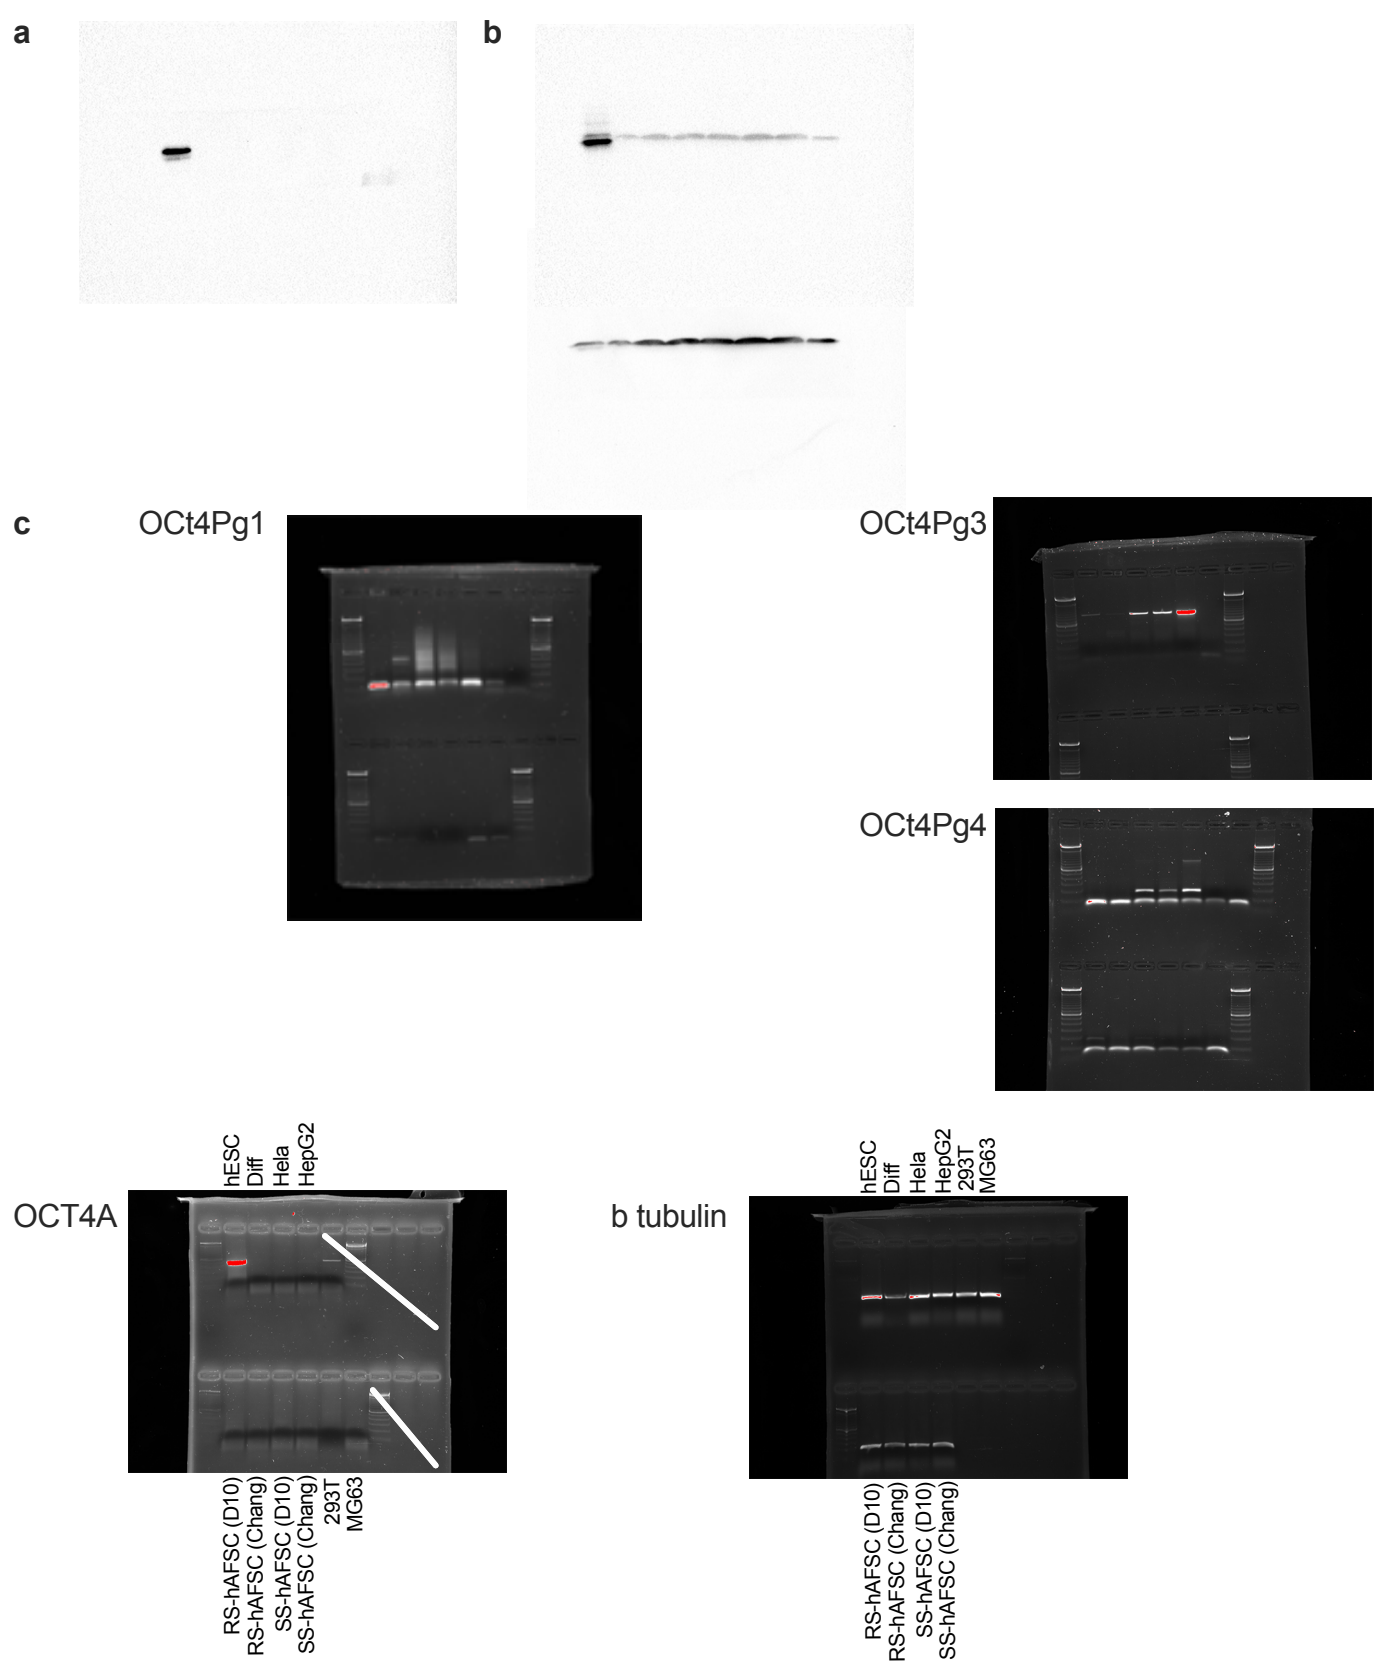

**Supplementary Figure 3:** Untouched blots corresponding to **(a)** Figure 3D left panel and **(b)** Figure 3d right panel, **(c)** Figure 6
